# Supplementary material for: Perceived Pain in Athletes: A Comparison between Endurance Runners and Powerlifters through a Cold Experimental Stimulation and Two Sessions of Various Physical Activation
Source: MDPI journal article supplement (doi:10.3390/sports10120211), 2022-12-19
Supplement: s1 [file s1]

**Table S1** Physiological values in Powerlifters before and after Strength Training - before and after CPT

| Powerlifters – Strength Training |     |    |      |               |     |     |      |         |     |     |      |          |     |    |      |
|----------------------------------|-----|----|------|---------------|-----|-----|------|---------|-----|-----|------|----------|-----|----|------|
| PRE training                     |     |    |      | POST training |     |     |      | PRE CPT |     |     |      | POST CPT |     |    |      |
| DBP                              | SBP | HR | TEMP | DBP           | SBP | HR  | TEMP | DBP     | SBP | HR  | TEMP | DBP      | SBP | HR | TEMP |
| 85                               | 148 | 80 | 35.9 | 92            | 146 | 108 | 36.4 | 86      | 141 | 98  | 36.2 | 88       | 138 | 93 | 36.1 |
| 88                               | 141 | 76 | 36.1 | 92            | 139 | 106 | 36.9 | 88      | 136 | 94  | 36.7 | 89       | 135 | 86 | 36.4 |
| 78                               | 145 | 78 | 36.2 | 81            | 143 | 111 | 36.7 | 74      | 137 | 100 | 36.6 | 78       | 135 | 96 | 36.4 |
| 76                               | 139 | 76 | 36.0 | 75            | 137 | 106 | 36.5 | 77      | 135 | 98  | 36.3 | 78       | 131 | 94 | 36.3 |
| 87                               | 148 | 78 | 36.1 | 84            | 147 | 108 | 36.8 | 78      | 142 | 96  | 36.6 | 81       | 136 | 97 | 36.5 |
| 76                               | 140 | 80 | 35.8 | 80            | 138 | 113 | 36.4 | 77      | 134 | 102 | 36.4 | 80       | 132 | 94 | 36.3 |
| 80                               | 138 | 78 | 36.3 | 76            | 142 | 107 | 36.9 | 73      | 137 | 94  | 36.8 | 78       | 134 | 86 | 36.7 |
| 79                               | 145 | 82 | 36.3 | 83            | 142 | 110 | 36.7 | 75      | 136 | 98  | 36.7 | 79       | 134 | 93 | 36.6 |
| 79                               | 142 | 76 | 36.4 | 84            | 139 | 98  | 36.6 | 82      | 135 | 87  | 36.5 | 84       | 130 | 79 | 36.6 |
| 80                               | 136 | 75 | 36.2 | 86            | 138 | 101 | 36.8 | 80      | 138 | 91  | 36.7 | 83       | 138 | 85 | 36.7 |
| 82                               | 138 | 76 | 35.8 | 82            | 136 | 102 | 36.5 | 79      | 134 | 94  | 36.3 | 84       | 136 | 85 | 36.2 |
| 77                               | 137 | 72 | 35.7 | 82            | 135 | 98  | 36.3 | 76      | 130 | 86  | 36.2 | 77       | 128 | 79 | 36.3 |
| 84                               | 143 | 81 | 36.0 | 91            | 146 | 105 | 36.7 | 89      | 141 | 96  | 36.5 | 91       | 136 | 90 | 36.5 |
| 76                               | 140 | 75 | 36.4 | 82            | 137 | 98  | 36.6 | 82      | 140 | 96  | 36.3 | 80       | 135 | 85 | 36.3 |
| 85                               | 149 | 74 | 36.1 | 90            | 146 | 104 | 36.3 | 88      | 142 | 95  | 36.2 | 91       | 134 | 87 | 36.3 |
| 80                               | 141 | 78 | 36.5 | 78            | 143 | 108 | 36.9 | 75      | 136 | 92  | 36.7 | 79       | 132 | 80 | 36.6 |
| 74                               | 138 | 76 | 35.8 | 82            | 136 | 106 | 36.4 | 84      | 136 | 95  | 36.4 | 85       | 132 | 82 | 36.4 |
| 82                               | 142 | 76 | 36.2 | 88            | 138 | 100 | 36.5 | 86      | 141 | 88  | 36.3 | 87       | 130 | 76 | 36.2 |
| 81                               | 144 | 80 | 36.3 | 85            | 142 | 112 | 36.7 | 79      | 137 | 96  | 36.6 | 81       | 140 | 88 | 36.5 |
| 76                               | 134 | 72 | 35.9 | 81            | 132 | 98  | 36.3 | 75      | 130 | 86  | 36.1 | 81       | 132 | 78 | 36.1 |
| 85                               | 132 | 78 | 35.6 | 89            | 138 | 107 | 36.2 | 85      | 136 | 97  | 35.9 | 89       | 133 | 83 | 36.0 |
| 76                               | 140 | 78 | 36.4 | 80            | 139 | 108 | 36.8 | 74      | 141 | 92  | 36.7 | 76       | 134 | 80 | 36.7 |

CPT: Cold Pressor Test; DBP (mmHg): Diastolic Blood Pressure; SBP (mmHg): Systolic Blood Pressure; HR (bpm): Heart Rate (beat per minute); Temp: Body Temperature (Celsius degrees).

**Table S2** Physiological values in Powerlifters before and after Aerobic Training - before and after CPT

| Powerlifters - Aerobic Training |     |    |      |               |     |     |      |         |     |     |      |          |     |    |      |
|---------------------------------|-----|----|------|---------------|-----|-----|------|---------|-----|-----|------|----------|-----|----|------|
| PRE training                    |     |    |      | POST training |     |     |      | PRE CPT |     |     |      | POST CPT |     |    |      |
| DBP                             | SBP | HR | Temp | DBP           | SBP | HR  | Temp | DBP     | SBP | HR  | Temp | DBP      | SBP | HR | Temp |
| 80                              | 146 | 76 | 35.8 | 78            | 147 | 110 | 36.7 | 79      | 145 | 99  | 36.5 | 80       | 144 | 94 | 36.6 |
| 87                              | 143 | 80 | 36.5 | 85            | 145 | 109 | 36.6 | 88      | 144 | 96  | 36.6 | 86       | 146 | 89 | 36.6 |
| 78                              | 144 | 75 | 36.0 | 76            | 138 | 107 | 36.7 | 76      | 142 | 94  | 36.4 | 78       | 142 | 85 | 36.3 |
| 77                              | 142 | 81 | 36.4 | 78            | 140 | 110 | 36.4 | 79      | 142 | 102 | 36.3 | 81       | 141 | 98 | 36.2 |
| 87                              | 148 | 84 | 35.8 | 84            | 136 | 116 | 36.5 | 86      | 138 | 104 | 36.2 | 86       | 140 | 89 | 36.3 |
| 78                              | 145 | 76 | 36.4 | 80            | 144 | 118 | 36.7 | 79      | 143 | 106 | 36.5 | 80       | 141 | 93 | 36.4 |
| 82                              | 140 | 79 | 36.2 | 80            | 140 | 112 | 36.8 | 81      | 141 | 102 | 36.7 | 81       | 138 | 99 | 36.5 |
| 76                              | 138 | 79 | 35.9 | 73            | 142 | 110 | 36.7 | 74      | 139 | 98  | 36.5 | 76       | 136 | 88 | 36.5 |
| 83                              | 146 | 80 | 36.6 | 78            | 136 | 99  | 36.6 | 81      | 140 | 86  | 36.4 | 82       | 139 | 87 | 36.6 |
| 80                              | 138 | 73 | 35.9 | 74            | 132 | 115 | 36.5 | 75      | 134 | 103 | 36.3 | 75       | 134 | 86 | 36.4 |
| 81                              | 136 | 75 | 36.2 | 79            | 142 | 112 | 36.3 | 78      | 144 | 101 | 36.2 | 79       | 146 | 90 | 36.5 |
| 78                              | 143 | 72 | 35.8 | 77            | 141 | 109 | 36.8 | 78      | 144 | 98  | 36.4 | 75       | 140 | 93 | 36.3 |
| 80                              | 138 | 70 | 35.4 | 83            | 132 | 116 | 36.6 | 83      | 139 | 106 | 36.3 | 81       | 138 | 85 | 36.2 |
| 76                              | 141 | 74 | 36.6 | 76            | 146 | 108 | 36.4 | 78      | 144 | 98  | 36.5 | 82       | 142 | 89 | 36.5 |
| 85                              | 149 | 73 | 35.6 | 82            | 151 | 107 | 36.4 | 83      | 150 | 92  | 36.3 | 78       | 148 | 83 | 36.4 |
| 75                              | 134 | 76 | 36.2 | 72            | 138 | 120 | 36.6 | 73      | 136 | 112 | 36.6 | 70       | 136 | 94 | 36.4 |
| 76                              | 146 | 78 | 36.3 | 74            | 136 | 116 | 36.8 | 84      | 138 | 101 | 36.6 | 84       | 136 | 98 | 36.6 |
| 80                              | 140 | 74 | 35.6 | 76            | 138 | 115 | 36.7 | 78      | 140 | 106 | 36.3 | 80       | 138 | 89 | 36.2 |
| 83                              | 148 | 82 | 36.5 | 81            | 145 | 112 | 36.8 | 80      | 144 | 99  | 36.5 | 78       | 146 | 86 | 36.5 |
| 74                              | 138 | 70 | 36.3 | 73            | 142 | 100 | 36.3 | 73      | 141 | 88  | 36.4 | 73       | 138 | 81 | 36.3 |
| 83                              | 149 | 74 | 36.4 | 83            | 144 | 102 | 36.7 | 82      | 146 | 87  | 36.6 | 81       | 144 | 84 | 36.5 |
| 75                              | 138 | 76 | 35.0 | 74            | 138 | 112 | 36.2 | 74      | 142 | 100 | 36.5 | 73       | 143 | 90 | 36.7 |

CPT: Cold Pressor Test; DBP (mmHg): Diastolic Blood Pressure; SBP (mmHg): Systolic Blood Pressure; HR (bpm): Heart Rate (beat per minute); Temp: Body Temperature (Celsius degrees).

**Table S3** Physiological values in Runners before and after Aerobic Training - before and after CPT

| Runners – Aerobic Training |     |    |      |               |     |     |      |         |     |    |      |          |     |    |      |
|----------------------------|-----|----|------|---------------|-----|-----|------|---------|-----|----|------|----------|-----|----|------|
| PRE training               |     |    |      | POST training |     |     |      | PRE CPT |     |    |      | POST CPT |     |    |      |
| DBP                        | SBP | HR | Temp | DBP           | SBP | HR  | Temp | DBP     | SBP | HR | Temp | DBP      | SBP | HR | Temp |
| 75                         | 108 | 55 | 36.1 | 68            | 106 | 85  | 36.6 | 70      | 111 | 80 | 36.5 | 72       | 110 | 85 | 36.5 |
| 74                         | 118 | 65 | 36.5 | 71            | 114 | 90  | 36.7 | 73      | 112 | 87 | 36.7 | 74       | 109 | 88 | 36.6 |
| 72                         | 126 | 60 | 36.4 | 68            | 120 | 98  | 36.8 | 70      | 122 | 92 | 36.5 | 72       | 119 | 90 | 36.6 |
| 73                         | 113 | 62 | 36.0 | 66            | 112 | 89  | 36.4 | 68      | 110 | 85 | 36.2 | 69       | 108 | 87 | 36.1 |
| 70                         | 115 | 58 | 35.8 | 64            | 109 | 84  | 36.3 | 68      | 112 | 83 | 36.3 | 71       | 110 | 85 | 36.3 |
| 67                         | 116 | 58 | 35.9 | 62            | 112 | 86  | 36.5 | 66      | 114 | 80 | 36.4 | 70       | 112 | 82 | 36.4 |
| 75                         | 120 | 68 | 36.2 | 64            | 118 | 91  | 36.6 | 65      | 117 | 89 | 36.5 | 64       | 115 | 90 | 36.3 |
| 64                         | 115 | 71 | 36.0 | 62            | 111 | 85  | 36.4 | 62      | 114 | 78 | 36.4 | 64       | 112 | 76 | 36.5 |
| 70                         | 115 | 58 | 36.3 | 68            | 112 | 86  | 36.8 | 67      | 110 | 83 | 36.7 | 69       | 108 | 85 | 36.7 |
| 76                         | 121 | 65 | 35.9 | 69            | 115 | 93  | 36.7 | 70      | 115 | 88 | 36.5 | 72       | 118 | 86 | 36.4 |
| 75                         | 113 | 62 | 36.2 | 68            | 108 | 96  | 36.7 | 71      | 112 | 92 | 36.6 | 72       | 110 | 89 | 36.6 |
| 76                         | 123 | 72 | 36.4 | 72            | 115 | 102 | 36.6 | 72      | 120 | 94 | 36.3 | 70       | 118 | 96 | 36.4 |
| 71                         | 120 | 58 | 35.8 | 65            | 116 | 92  | 36.5 | 64      | 113 | 90 | 36.5 | 66       | 107 | 94 | 36.4 |
| 73                         | 126 | 63 | 36.2 | 66            | 118 | 96  | 36.9 | 68      | 120 | 92 | 36.8 | 71       | 116 | 88 | 36.8 |
| 72                         | 118 | 62 | 35.9 | 66            | 112 | 97  | 36.3 | 67      | 116 | 94 | 36.2 | 69       | 110 | 96 | 36.3 |
| 73                         | 120 | 57 | 36.1 | 67            | 116 | 91  | 36.7 | 72      | 119 | 86 | 36.5 | 71       | 116 | 90 | 36.4 |
| 71                         | 123 | 60 | 36.5 | 65            | 118 | 96  | 36.8 | 65      | 116 | 94 | 36.7 | 68       | 121 | 92 | 36.6 |
| 75                         | 126 | 71 | 36.3 | 71            | 120 | 104 | 36.5 | 72      | 119 | 98 | 36.5 | 71       | 116 | 92 | 36.4 |
| 73                         | 126 | 66 | 35.8 | 64            | 117 | 99  | 36.4 | 66      | 121 | 95 | 36.2 | 68       | 116 | 94 | 36.2 |
| 71                         | 125 | 68 | 36.1 | 63            | 121 | 98  | 36.6 | 68      | 119 | 93 | 36.5 | 70       | 122 | 92 | 36.3 |
| 68                         | 120 | 63 | 35.9 | 63            | 115 | 95  | 36.3 | 67      | 116 | 91 | 36.3 | 68       | 110 | 93 | 36.1 |
| 75                         | 123 | 70 | 36.6 | 67            | 118 | 99  | 36.9 | 72      | 121 | 88 | 36.7 | 73       | 117 | 90 | 36.7 |

CPT: Cold Pressor Test; DBP (mmHg): Diastolic Blood Pressure; SBP (mmHg): Systolic Blood Pressure; HR (bpm): Heart Rate (beat per minute); Temp: Body Temperature (Celsius degrees).

**Table S4** Physiological values in Runners before and after Strength Training - before and after CPT

| Runners – Strength Training |     |    |      |                      |     |    |      |                |     |    |      |                 |     |    |      |
|-----------------------------|-----|----|------|----------------------|-----|----|------|----------------|-----|----|------|-----------------|-----|----|------|
| <i>PRE training</i>         |     |    |      | <i>POST training</i> |     |    |      | <i>PRE CPT</i> |     |    |      | <i>POST CPT</i> |     |    |      |
| DBP                         | SBP | HR | Temp | DBP                  | SBP | HR | Temp | DBP            | SBP | HR | Temp | DBP             | SBP | HR | Temp |
| 78                          | 110 | 64 | 36.2 | 76                   | 109 | 78 | 36.7 | 76             | 110 | 74 | 36.6 | 77              | 110 | 72 | 36.6 |
| 73                          | 120 | 66 | 36.5 | 68                   | 118 | 76 | 36.6 | 70             | 120 | 78 | 36.6 | 72              | 121 | 74 | 36.5 |
| 71                          | 124 | 59 | 36.2 | 66                   | 121 | 74 | 36.7 | 68             | 124 | 68 | 36.5 | 71              | 123 | 67 | 36.4 |
| 73                          | 116 | 65 | 36.1 | 68                   | 112 | 73 | 36.4 | 70             | 115 | 70 | 36.3 | 71              | 118 | 68 | 36.3 |
| 68                          | 110 | 60 | 35.4 | 66                   | 108 | 71 | 35.8 | 71             | 112 | 68 | 35.9 | 73              | 114 | 65 | 36.0 |
| 67                          | 116 | 62 | 36.1 | 65                   | 113 | 73 | 36.3 | 69             | 118 | 74 | 36.5 | 70              | 118 | 69 | 36.4 |
| 71                          | 118 | 66 | 36.1 | 68                   | 120 | 78 | 36.3 | 71             | 116 | 73 | 36.2 | 72              | 120 | 67 | 36.3 |
| 68                          | 120 | 68 | 36.4 | 70                   | 122 | 85 | 36.6 | 69             | 119 | 78 | 36.2 | 69              | 121 | 75 | 36.2 |
| 72                          | 121 | 62 | 36.2 | 70                   | 117 | 71 | 36.6 | 71             | 120 | 68 | 36.5 | 72              | 119 | 70 | 36.5 |
| 73                          | 115 | 70 | 36.4 | 69                   | 112 | 81 | 36.7 | 71             | 114 | 78 | 36.4 | 74              | 118 | 70 | 36.5 |
| 72                          | 116 | 71 | 36.6 | 68                   | 113 | 84 | 36.8 | 68             | 112 | 81 | 36.6 | 71              | 113 | 75 | 36.4 |
| 74                          | 119 | 71 | 36.4 | 72                   | 115 | 83 | 36.6 | 73             | 118 | 74 | 36.4 | 73              | 120 | 71 | 36.3 |
| 72                          | 118 | 64 | 35.8 | 67                   | 110 | 76 | 36.2 | 69             | 117 | 72 | 36.4 | 70              | 118 | 66 | 36.4 |
| 66                          | 115 | 65 | 36.6 | 64                   | 116 | 77 | 36.8 | 65             | 113 | 67 | 36.5 | 68              | 117 | 67 | 36.4 |
| 72                          | 118 | 66 | 36.1 | 69                   | 111 | 75 | 36.4 | 70             | 112 | 67 | 36.4 | 72              | 114 | 62 | 36.2 |
| 74                          | 122 | 62 | 36.3 | 74                   | 121 | 73 | 36.6 | 76             | 119 | 70 | 36.4 | 74              | 118 | 67 | 36.3 |
| 70                          | 120 | 59 | 36.2 | 68                   | 116 | 68 | 36.4 | 64             | 117 | 63 | 36.3 | 67              | 124 | 59 | 36.2 |
| 75                          | 128 | 68 | 36.2 | 73                   | 119 | 76 | 36.6 | 75             | 121 | 73 | 36.7 | 75              | 118 | 69 | 36.3 |
| 71                          | 125 | 64 | 36.0 | 67                   | 122 | 78 | 36.3 | 69             | 125 | 66 | 36.4 | 71              | 128 | 65 | 36.4 |
| 68                          | 120 | 70 | 36.3 | 66                   | 116 | 81 | 36.6 | 65             | 118 | 75 | 36.2 | 67              | 121 | 72 | 36.2 |
| 71                          | 128 | 73 | 36.2 | 65                   | 124 | 89 | 36.5 | 70             | 126 | 79 | 36.4 | 73              | 128 | 73 | 36.3 |
| 78                          | 130 | 76 | 36.6 | 74                   | 126 | 95 | 36.7 | 75             | 128 | 84 | 36.5 | 76              | 131 | 82 | 36.3 |

CPT: Cold Pressor Test; DBP (mmHg): Diastolic Blood Pressure; SBP (mmHg): Systolic Blood Pressure; HR (bpm): Heart Rate (beat per minute); Temp: Body Temperature (Celsius degrees).

**Table S5** Physiological values in Controls before and after Aerobic Training - before and after CPT

| <b>Controls – Aerobic Training</b> |     |    |      |                      |     |     |      |                |     |     |      |                 |     |     |      |
|------------------------------------|-----|----|------|----------------------|-----|-----|------|----------------|-----|-----|------|-----------------|-----|-----|------|
| <i>PRE training</i>                |     |    |      | <i>POST training</i> |     |     |      | <i>PRE CPT</i> |     |     |      | <i>POST CPT</i> |     |     |      |
| DBP                                | SBP | HR | Temp | DBP                  | SBP | HR  | Temp | DBP            | SBP | HR  | Temp | DBP             | SBP | HR  | Temp |
| 72                                 | 122 | 73 | 36.3 | 68                   | 123 | 110 | 36.6 | 71             | 124 | 106 | 36.6 | 72              | 123 | 98  | 36.6 |
| 80                                 | 136 | 73 | 36.4 | 78                   | 132 | 114 | 36.5 | 77             | 134 | 109 | 36.5 | 76              | 133 | 100 | 36.4 |
| 78                                 | 141 | 68 | 36.2 | 76                   | 139 | 89  | 36.6 | 78             | 136 | 85  | 36.5 | 78              | 135 | 80  | 36.5 |
| 72                                 | 118 | 65 | 36.3 | 73                   | 117 | 90  | 36.8 | 74             | 118 | 84  | 36.7 | 72              | 106 | 79  | 36.5 |
| 80                                 | 120 | 69 | 36.1 | 76                   | 118 | 111 | 36.4 | 80             | 120 | 96  | 36.5 | 79              | 121 | 89  | 36.6 |
| 75                                 | 122 | 72 | 36.1 | 77                   | 125 | 96  | 36.7 | 76             | 128 | 89  | 36.4 | 75              | 126 | 83  | 36.4 |
| 73                                 | 135 | 71 | 36.4 | 68                   | 129 | 112 | 36.6 | 70             | 131 | 97  | 36.5 | 69              | 130 | 91  | 36.4 |
| 68                                 | 115 | 70 | 36.3 | 68                   | 112 | 109 | 36.7 | 70             | 116 | 95  | 36.6 | 71              | 118 | 88  | 36.3 |
| 80                                 | 136 | 72 | 36.2 | 76                   | 132 | 108 | 36.9 | 77             | 129 | 98  | 36.8 | 78              | 130 | 88  | 36.7 |
| 71                                 | 121 | 65 | 36.1 | 69                   | 119 | 87  | 36.5 | 72             | 123 | 81  | 36.5 | 72              | 123 | 78  | 36.5 |
| 73                                 | 130 | 74 | 36.2 | 69                   | 128 | 113 | 36.7 | 72             | 130 | 94  | 36.6 | 74              | 129 | 90  | 36.4 |
| 72                                 | 116 | 71 | 36.2 | 73                   | 118 | 109 | 36.5 | 74             | 122 | 96  | 36.4 | 73              | 121 | 91  | 36.4 |
| 84                                 | 142 | 73 | 36.3 | 82                   | 138 | 115 | 36.8 | 84             | 140 | 98  | 36.7 | 82              | 139 | 92  | 36.6 |
| 72                                 | 123 | 70 | 36.1 | 68                   | 121 | 106 | 37.0 | 67             | 119 | 92  | 36.8 | 68              | 120 | 87  | 36.6 |
| 75                                 | 119 | 67 | 36.1 | 76                   | 120 | 94  | 36.7 | 78             | 123 | 88  | 36.6 | 80              | 125 | 83  | 36.5 |
| 74                                 | 118 | 76 | 36.4 | 67                   | 115 | 112 | 36.6 | 71             | 120 | 90  | 36.6 | 70              | 119 | 85  | 36.4 |
| 80                                 | 132 | 75 | 36.4 | 78                   | 126 | 108 | 36.6 | 76             | 130 | 96  | 36.5 | 76              | 130 | 86  | 36.5 |
| 76                                 | 124 | 70 | 36.3 | 78                   | 123 | 116 | 36.5 | 78             | 120 | 98  | 36.5 | 79              | 123 | 87  | 36.4 |
| 68                                 | 120 | 66 | 36.0 | 71                   | 124 | 106 | 36.2 | 68             | 123 | 96  | 36.1 | 70              | 120 | 90  | 36.2 |
| 76                                 | 112 | 65 | 36.3 | 73                   | 110 | 89  | 36.5 | 72             | 112 | 82  | 36.3 | 71              | 110 | 76  | 36.4 |
| 74                                 | 121 | 63 | 36.2 | 72                   | 119 | 87  | 36.4 | 74             | 125 | 80  | 36.4 | 73              | 122 | 76  | 36.3 |
| 76                                 | 124 | 69 | 36.3 | 73                   | 122 | 92  | 36.7 | 74             | 123 | 81  | 36.5 | 75              | 126 | 74  | 36.5 |

CPT: Cold Pressor Test; DBP (mmHg): Diastolic Blood Pressure; SBP (mmHg): Systolic Blood Pressure; HR (bpm): Heart Rate (beat per minute); Temp: Body Temperature (Celsius degrees).

**Table S6** Physiological values in Controls before and after Strength Training - before and after CPT

| Controls – Strength Training |     |    |      |               |     |     |      |         |     |    |      |          |     |    |      |
|------------------------------|-----|----|------|---------------|-----|-----|------|---------|-----|----|------|----------|-----|----|------|
| PRE training                 |     |    |      | POST training |     |     |      | PRE CPT |     |    |      | POST CPT |     |    |      |
| DBP                          | SBP | HR | Temp | DBP           | SBP | HR  | Temp | DBP     | SBP | HR | Temp | DBP      | SBP | HR | Temp |
| 75                           | 118 | 68 | 36.2 | 71            | 116 | 80  | 36.4 | 72      | 117 | 78 | 36.4 | 71       | 116 | 76 | 36.4 |
| 80                           | 128 | 73 | 36.3 | 79            | 126 | 91  | 36.6 | 80      | 128 | 87 | 36.7 | 79       | 128 | 79 | 36.6 |
| 76                           | 122 | 67 | 36.1 | 74            | 119 | 89  | 36.4 | 76      | 121 | 83 | 36.4 | 75       | 119 | 80 | 36.4 |
| 76                           | 124 | 70 | 36.5 | 73            | 120 | 85  | 36.6 | 78      | 123 | 80 | 36.4 | 80       | 125 | 73 | 36.3 |
| 81                           | 126 | 65 | 35.4 | 78            | 122 | 83  | 36.0 | 80      | 124 | 77 | 36.2 | 80       | 122 | 70 | 36.1 |
| 78                           | 118 | 66 | 36.2 | 77            | 115 | 80  | 36.4 | 80      | 120 | 72 | 36.3 | 81       | 122 | 68 | 36.2 |
| 83                           | 135 | 80 | 36.6 | 82            | 136 | 106 | 36.7 | 81      | 138 | 92 | 36.7 | 82       | 140 | 85 | 36.5 |
| 74                           | 125 | 76 | 36.1 | 76            | 123 | 99  | 36.3 | 78      | 128 | 82 | 36.2 | 78       | 130 | 77 | 36.2 |
| 72                           | 121 | 71 | 36.3 | 70            | 119 | 102 | 36.6 | 72      | 121 | 91 | 36.4 | 71       | 120 | 81 | 36.3 |
| 75                           | 120 | 69 | 36.7 | 73            | 118 | 95  | 36.9 | 74      | 119 | 88 | 36.8 | 76       | 125 | 78 | 36.1 |
| 74                           | 130 | 68 | 36.2 | 72            | 129 | 98  | 36.4 | 71      | 132 | 80 | 36.4 | 72       | 136 | 73 | 36.3 |
| 80                           | 139 | 75 | 36.6 | 78            | 136 | 105 | 36.8 | 80      | 140 | 96 | 36.6 | 81       | 142 | 84 | 36.7 |
| 82                           | 140 | 77 | 36.2 | 79            | 138 | 110 | 36.5 | 78      | 141 | 98 | 36.4 | 80       | 140 | 88 | 36.3 |
| 74                           | 120 | 72 | 36.1 | 71            | 117 | 100 | 36.4 | 74      | 119 | 83 | 36.3 | 77       | 128 | 71 | 36.3 |
| 75                           | 118 | 75 | 36.4 | 73            | 116 | 112 | 36.6 | 74      | 118 | 97 | 36.4 | 76       | 127 | 82 | 36.5 |
| 76                           | 124 | 68 | 36.0 | 73            | 120 | 90  | 36.3 | 72      | 121 | 84 | 36.3 | 72       | 119 | 72 | 36.2 |
| 79                           | 135 | 70 | 36.7 | 77            | 131 | 99  | 36.9 | 81      | 137 | 83 | 36.7 | 79       | 135 | 74 | 36.5 |
| 76                           | 115 | 72 | 36.2 | 73            | 112 | 101 | 36.6 | 75      | 114 | 92 | 36.5 | 75       | 118 | 83 | 36.5 |
| 78                           | 127 | 65 | 35.8 | 77            | 124 | 94  | 36.1 | 78      | 124 | 79 | 36.1 | 80       | 127 | 68 | 36.3 |
| 79                           | 141 | 72 | 36.5 | 76            | 138 | 106 | 36.7 | 78      | 140 | 89 | 36.4 | 76       | 138 | 76 | 36.2 |
| 73                           | 126 | 67 | 35.9 | 70            | 123 | 89  | 36.2 | 73      | 126 | 77 | 36.2 | 78       | 129 | 67 | 36.2 |
| 71                           | 128 | 70 | 36.4 | 68            | 125 | 94  | 36.6 | 70      | 128 | 81 | 36.4 | 70       | 126 | 74 | 36.2 |

CPT: Cold Pressor Test; DBP (mmHg): Diastolic Blood Pressure; SBP (mmHg): Systolic Blood Pressure; HR (bpm): Heart Rate (beat per minute); Temp: Body Temperature (Celsius degrees).
